# Supplementary material
Source: publisher site journal article supplement (https://www.spandidos-publications.com/4953/downloadSupplementary)

Figure S1. Representative impedance traces of cardiomyocyte cultures during treatment with different compounds. (A) Azimilide. (B) Chlorpromazine; (C) Metoprolol; (D) Amiodarone.

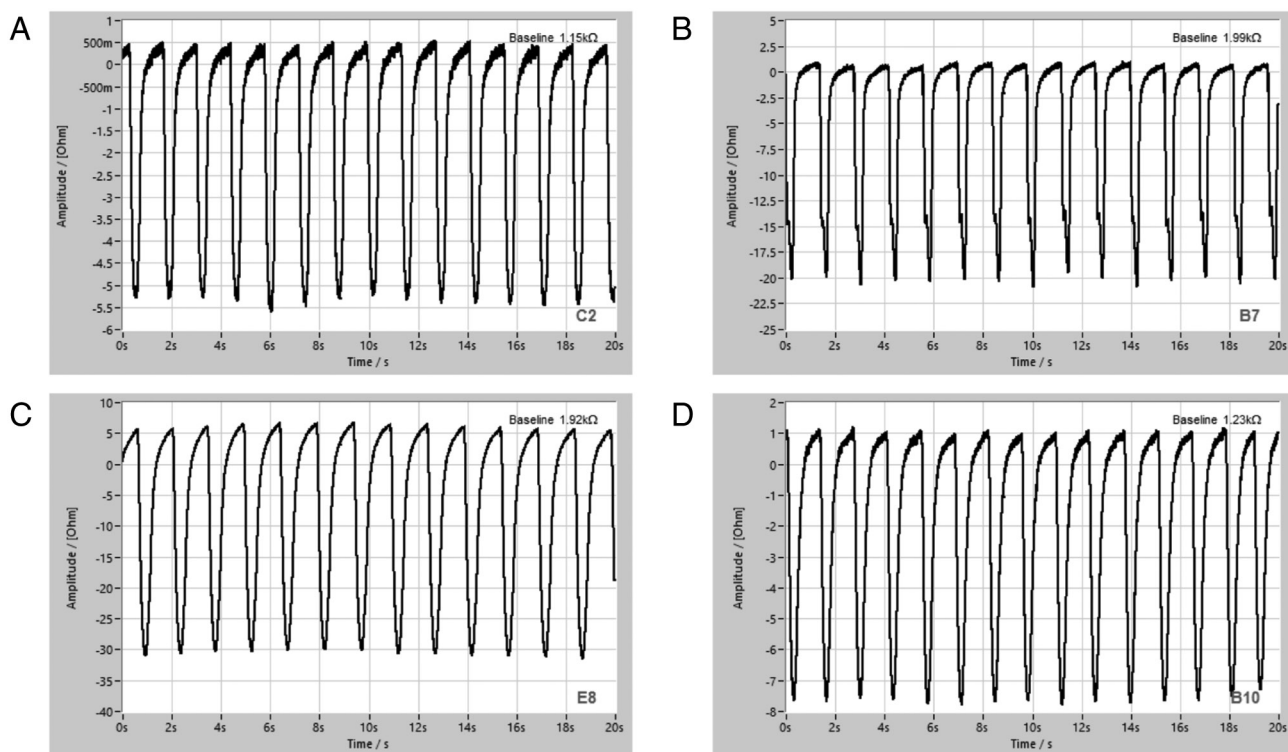

Figure S2. Effects of high torsades de pointes compounds on field potential duration. Pre, pre-administration; Post, post-administration; FPDc, field potential duration correction.

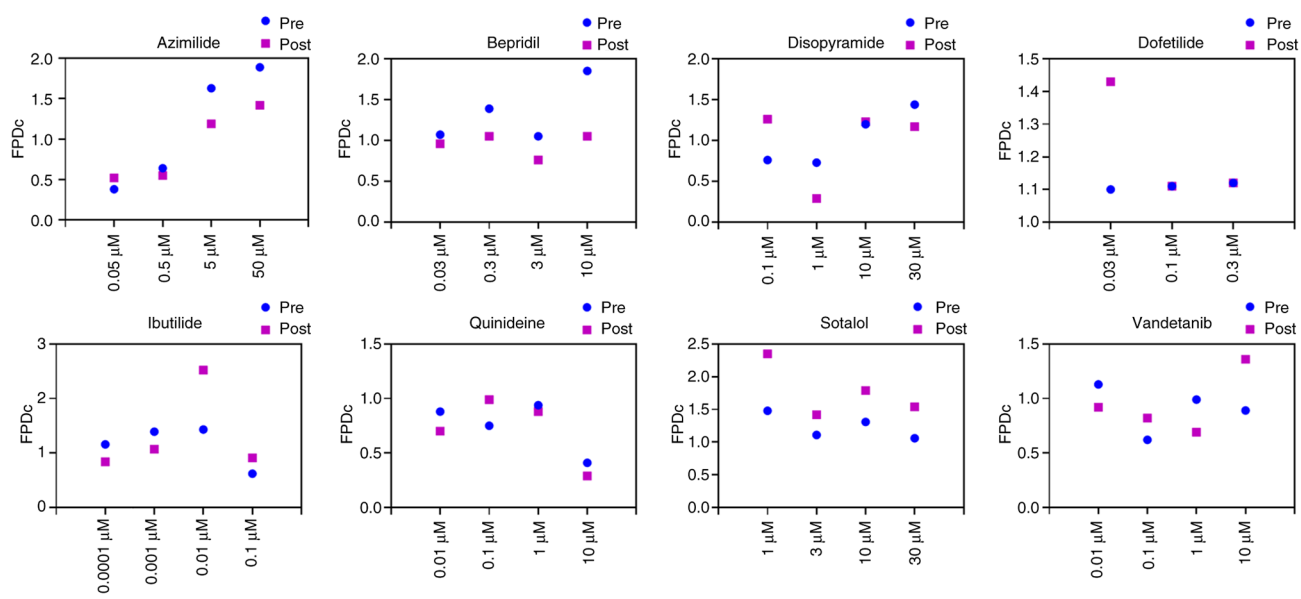

Figure S3. Effects of intermediate torsades de pointes compounds on FPD. Pre, pre-administration; Post, post-administration; FPDc, corrected field potential duration.

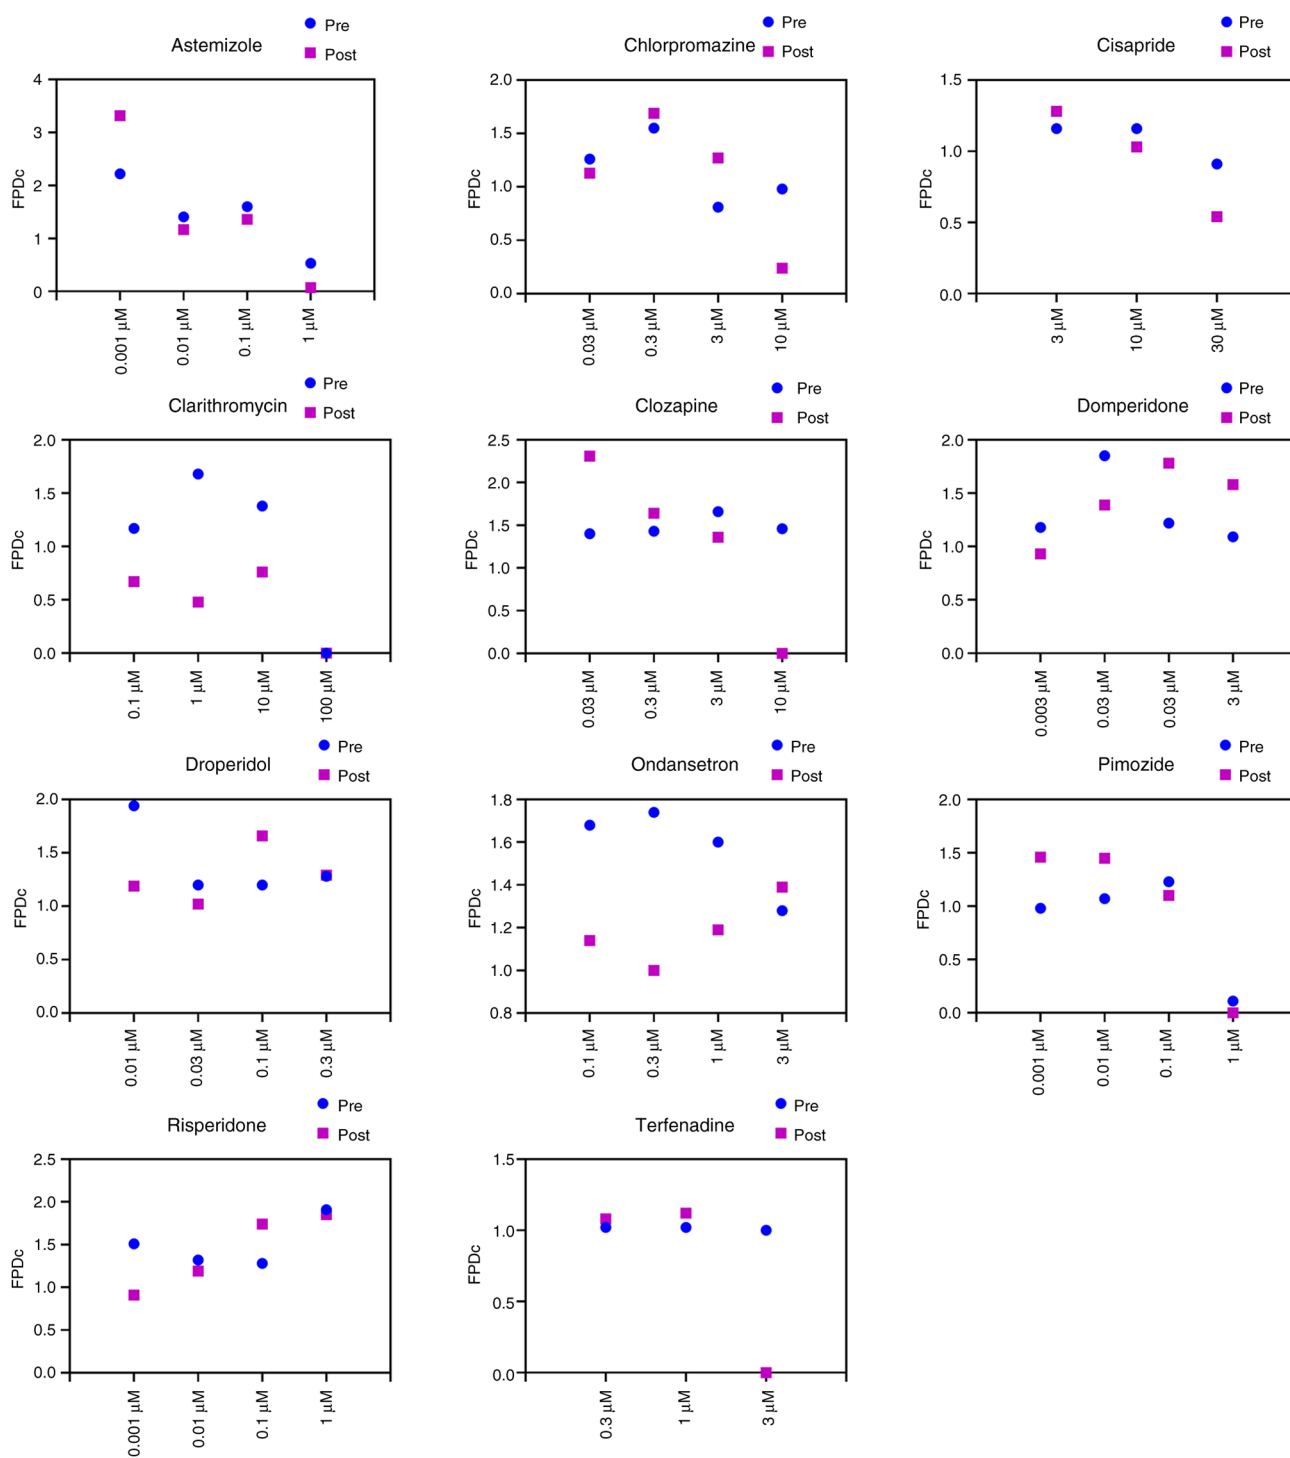

Figure S4. Effects of low torsades de pointes compounds on FPD. Pre, pre-administration; Post, post-administration; FPDc, corrected field potential duration.

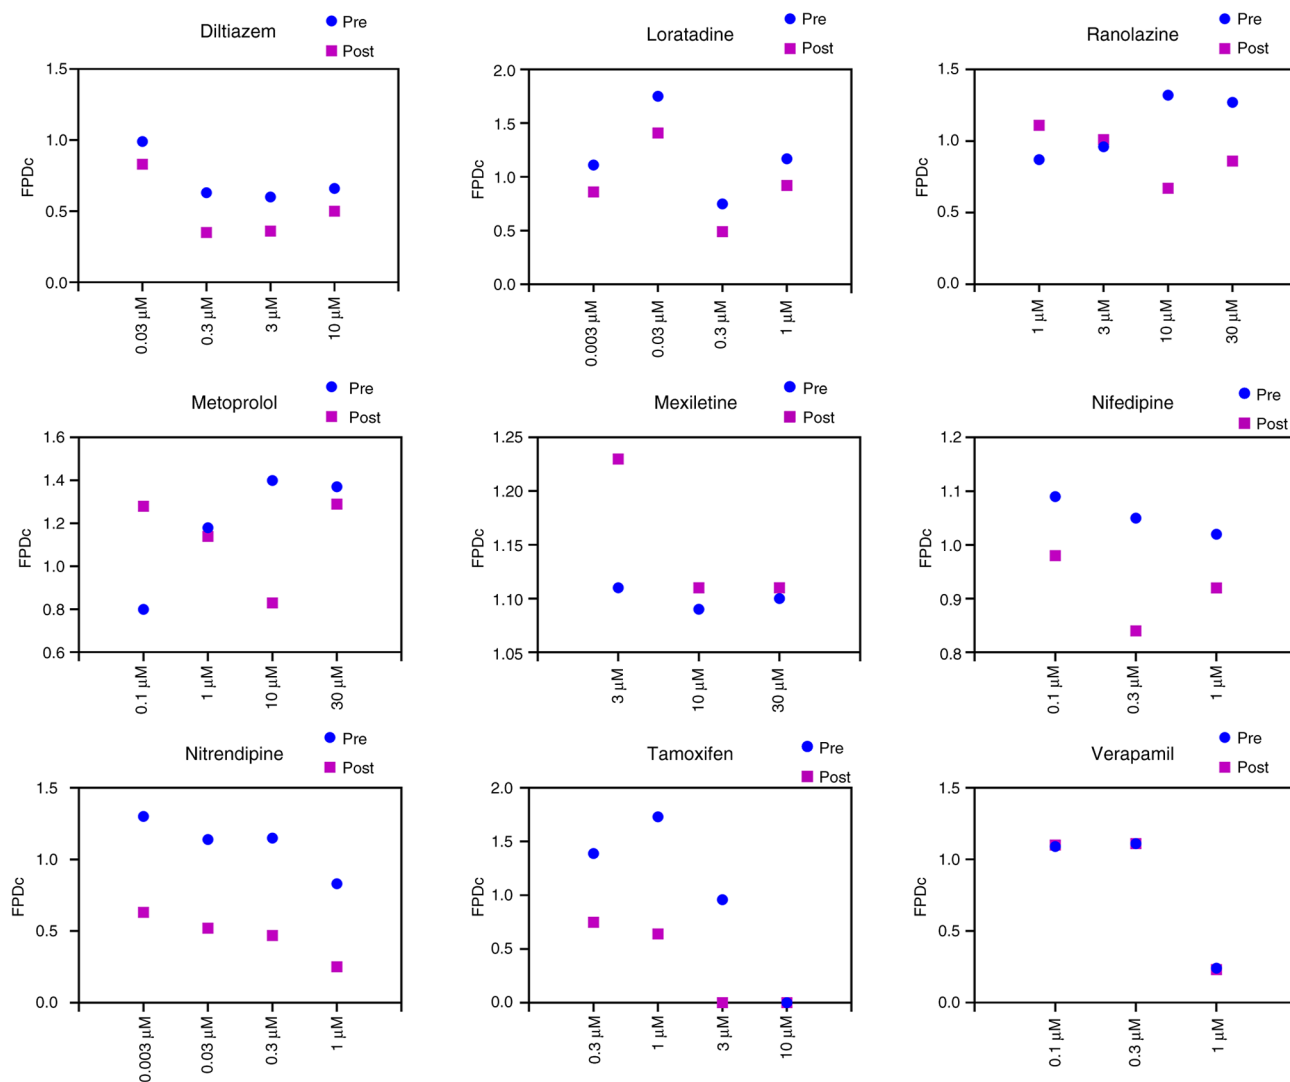

Figure S5. Effects of non-Comprehensive *in vitro* Proarrhythmia Assay compounds on FPD. Pre, pre-administration; Post, post-administration; FPDc, corrected field potential duration.

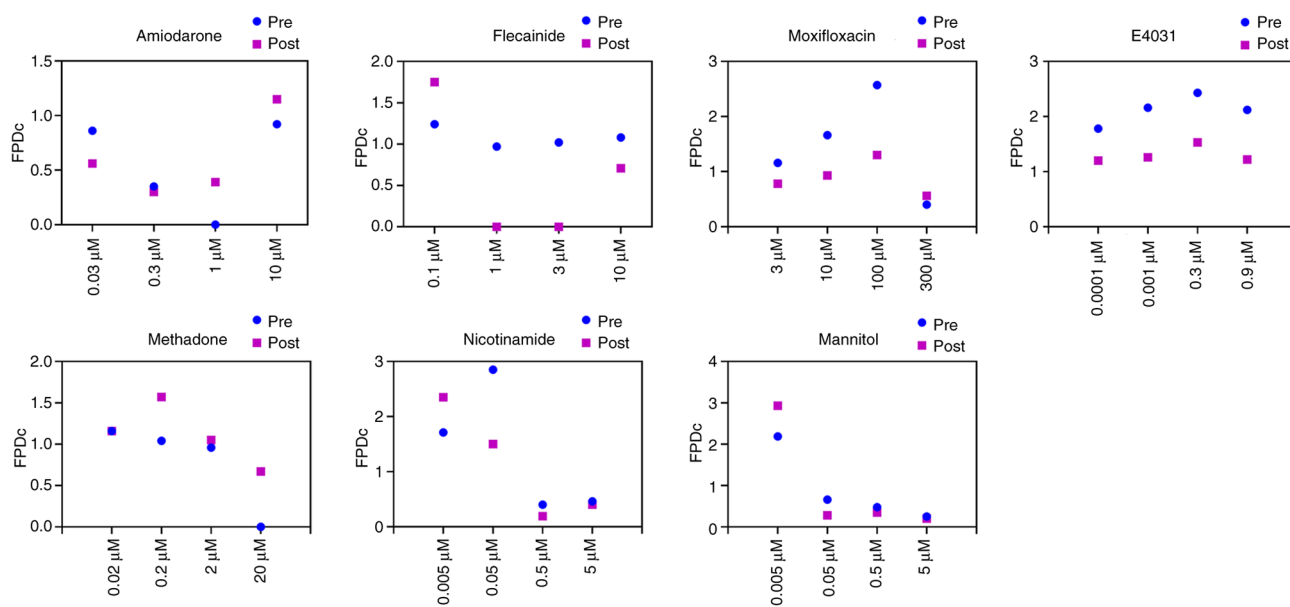

Supplement: Supplementary file 1 [file downloadSupplementary]
